# Supplementary material for: Caffeine Induces High Expression of cyp-35A Family Genes and Inhibits the Early Larval Development in Caenorhabditis elegans
Source: PubMed Central journal article supplement — Mol Cells. 2015 Jan 16;38(3):236–42. doi: 10.14348/molcells.2015.2282 (PMC4363723; doi:10.14348/molcells.2015.2282), 2015-01-16
Supplement: molcell-38-3-236-supple2.pdf [file molcell-38-3-236-supple2.pdf]

**Table S1.** List of up- and down-regulated *cyp* genes by caffeine treatment\*

| <b>Coding sequence</b> | <b>Gene name</b> | <b>Chromosome</b> | <b>Fold increased</b> | <b>p-value</b> | <b>GO ID</b> | <b>GO term name</b>         |
|------------------------|------------------|-------------------|-----------------------|----------------|--------------|-----------------------------|
| C49G7.8                | <i>cyp-35A4</i>  | 5                 | 33.2                  | 0.0113         | 0055114      | oxidation-reduction process |
| K09D9.2                | <i>cyp-35A3</i>  | 5                 | 32.5                  | 0.0211         | 0055114      | oxidation-reduction process |
| K07C6.5                | <i>cyp-35A5</i>  | 5                 | 28.9                  | 0.0071         | 0055114      | oxidation-reduction process |
| C03G6.15               | <i>cyp-35A2</i>  | 5                 | 28.5                  | 0.0084         | 0055114      | oxidation-reduction process |
| B0213.15               | <i>cyp-34A9</i>  | 5                 | 10.0                  | 0.0056         | 0055114      | oxidation-reduction process |
| F08F3.7                | <i>cyp-14A5</i>  | 5                 | 8.3                   | 0.0054         | 0055114      | oxidation-reduction process |
| R04D3.1                | <i>cyp-14A4</i>  | X                 | 7.9                   | 0.0181         | 0055114      | oxidation-reduction process |
| K07C6.3                | <i>cyp-35B2</i>  | 5                 | 6.5                   | 0.0233         | 0055114      | oxidation-reduction process |
| C50H11.15              | <i>cyp-33C9</i>  | 5                 | 3.4                   | 0.0027         | 0055114      | oxidation-reduction process |
| C26F1.2                | <i>cyp-32A1</i>  | 5                 | 3.3                   | 0.0125         | 0055114      | oxidation-reduction process |
| F42A9.5                | <i>cyp-33E2</i>  | 4                 | 2.9                   | 0.0146         | 0055114      | oxidation-reduction process |
| F41B5.2                | <i>cyp-33C7</i>  | 5                 | 2.8                   | 0.0517         | 0055114      | oxidation-reduction process |
| F14F7.3                | <i>cyp-13A12</i> | 3                 | 2.7                   | 0.0348         | 0055114      | oxidation-reduction process |
| K07C6.4                | <i>cyp-35B1</i>  | 3                 | 2.4                   | 0.0062         | 0055114      | oxidation-reduction process |
| K09A11.2               | <i>cyp-14A1</i>  | X                 | 2.4                   | 0.0383         | 0055114      | oxidation-reduction process |
| F44C8.1                | <i>cyp-33C4</i>  | 5                 | 2.4                   | 0.0400         | 0055114      | oxidation-reduction process |
| B0213.12               | <i>cyp-34A7</i>  | 5                 | 2.4                   | 0.0510         | 0055114      | oxidation-reduction process |
| C49C8.4                | <i>cyp-33E1</i>  | 4                 | 2.2                   | 0.0246         | 0055114      | oxidation-reduction process |
| F41B5.7                | <i>cyp-33C6</i>  | 5                 | 2.2                   | 0.0495         | 0055114      | oxidation-reduction process |
| F42A9.4                | <i>cyp-33E3</i>  | 4                 | 2.1                   | 0.0161         | 0055114      | oxidation-reduction process |
| K09A11.3               | <i>cyp-14A2</i>  | X                 | 2.0                   | 0.0185         | 0055114      | oxidation-reduction process |
| F41B5.4                | <i>cyp-33C3</i>  | 5                 | 2.0                   | 0.0337         | 0055114      | oxidation-reduction process |
| T10B9.4                | <i>cyp-13A8</i>  | 2                 | 2.0                   | 0.0128         | 0055114      | oxidation-reduction process |
| E03E2.1                | <i>cyp-43A1</i>  | X                 | 2.0                   | 0.0147         | 0055114      | oxidation-reduction process |
| F41B5.3                | <i>cyp-33C5</i>  | 5                 | 1.8                   | 0.0500         | 0055114      | oxidation-reduction process |
| C36A4.2                | <i>cyp-25A2</i>  | 3                 | 1.8                   | 0.0401         | 0055114      | oxidation-reduction process |
| C34B7.3                | <i>cyp-36A1</i>  | 1                 | 1.7                   | 0.0172         | 0055114      | oxidation-reduction process |

|         |                 |   |     |        |         |                             |
|---------|-----------------|---|-----|--------|---------|-----------------------------|
| ZK177.5 | <i>cyp-44A1</i> | 2 | 0.9 | 0.0386 | 0055114 | oxidation-reduction process |
| C01G6.6 | <i>mtrr-1</i>   | 2 | 0.5 | 0.0246 | 0055114 | oxidation-reduction process |

---

\*Only *cyp* genes that showed  $p < 0.05$  are listed as described in Materials and Methods.

**Table S2.** Transition of % distribution of worms in each developmental stage in 24 h intervals for 96 h at different caffeine concentration

| <b>0 mM</b>  | <b>24 h</b> | <b>48 h</b> | <b>72 h</b> | <b>96 h</b> |
|--------------|-------------|-------------|-------------|-------------|
| <b>L1</b>    | 0.0         | 0.0         | 0.0         | 0.0         |
| <b>L2</b>    | 2.3 ± 3.1   | 0.0         | 0.0         | 0.0         |
| <b>L3</b>    | 97.4 ± 0.6  | 0.0         | 0.0         | 0.0         |
| <b>L4</b>    | 0.3 ± 1.0   | 41.5 ± 5.1  | 0.0         | 0.0         |
| <b>YA</b>    | 0.0         | 58.4 ± 3.2  | 1.3 ± 1.2   | 0.0         |
| <b>A</b>     | 0.0         | 0.1 ± 0.5   | 98.7 ± 0.5  | 100.0       |
| <b>10 mM</b> | <b>24 h</b> | <b>48 h</b> | <b>72 h</b> | <b>96 h</b> |
| <b>L1</b>    | 3.0 ± 3.5   | 0.0         | 0.0         | 0.0         |
| <b>L2</b>    | 91.7 ± 1.9  | 23.4 ± 2.8  | 1.4 ± 2.3   | 0.0         |
| <b>L3</b>    | 5.3 ± 1.7   | 71.1 ± 8.0  | 1.8 ± 2.4   | 0.0         |
| <b>L4</b>    | 0.0         | 5.5 ± 6.6   | 20.4 ± 2.8  | 0.0         |
| <b>YA</b>    | 0.0         | 0.0         | 24.5 ± 8.5  | 1.1 ± 1.3   |
| <b>A</b>     | 0.0         | 0.0         | 51.9 ± 12.1 | 98.9 ± 0.4  |
| <b>30 mM</b> | <b>24 h</b> | <b>48 h</b> | <b>72 h</b> | <b>96 h</b> |
| <b>L1</b>    | 100.0       | 90.6 ± 1.4  | 86.7 ± 3.7  | 86.1 ± 3.4  |
| <b>L2</b>    | 0.0         | 9.2 ± 2.1   | 13.1 ± 2.2  | 13.4 ± 1.2  |
| <b>L3</b>    | 0.0         | 0.2 ± 0.1   | 0.2 ± 0.4   | 0.5 ± 0.2   |
| <b>L4</b>    | 0.0         | 0.0         | 0.0         | 0.0         |
| <b>YA</b>    | 0.0         | 0.0         | 0.0         | 0.0         |
| <b>A</b>     | 0.0         | 0.0         | 0.0         | 0.0         |

Average percent distributions of worms in each developmental stage after caffeine treatment are summarized. Data are presented as a line graph in Fig. 2. About 2,700 individuals (triplicates of 900 individuals per plate) were scored for each concentration of caffeine treatment. L1 to L4, L1 to L4 larval stages; YA, young adult stage; A, adult stage



| 72 h  |              |                 |                 |                 |                 |              |
|-------|--------------|-----------------|-----------------|-----------------|-----------------|--------------|
| 0 mM  | mock         | <i>cyp-35A2</i> | <i>cyp-35A3</i> | <i>cyp-35A4</i> | <i>cyp-35A5</i> | quadruple*   |
| L1    | 0.0 ± 0.00   | 0.0 ± 0.00      | 0.0 ± 0.00      | 0.0 ± 0.00      | 0.0 ± 0.00      | 0.0 ± 0.00   |
| L2    | 0.0 ± 0.00   | 0.0 ± 0.00      | 0.0 ± 0.00      | 0.0 ± 0.00      | 0.0 ± 0.00      | 0.0 ± 0.00   |
| L3    | 0.0 ± 0.00   | 0.0 ± 0.00      | 0.0 ± 0.00      | 0.0 ± 0.00      | 0.0 ± 0.00      | 0.0 ± 0.00   |
| L4    | 0.0 ± 0.00   | 0.0 ± 0.00      | 0.0 ± 0.00      | 0.0 ± 0.00      | 0.0 ± 0.00      | 0.0 ± 0.00   |
| YA    | 0.0 ± 0.00   | 1.5 ± 0.01      | 1.7 ± 0.02      | 0.0 ± 0.00      | 0.4 ± 0.01      | 0.7 ± 0.01   |
| A     | 100.0 ± 0.00 | 98.5 ± 0.23     | 98.3 ± 0.19     | 100.0 ± 0.00    | 99.6 ± 0.17     | 99.3 ± 0.79  |
| 10 mM | mock         | <i>cyp-35A2</i> | <i>cyp-35A3</i> | <i>cyp-35A4</i> | <i>cyp-35A5</i> | quadruple*   |
| L1    | 0.2 ± 0.01   | 0.0 ± 0.00      | 0.0 ± 0.00      | 0.0 ± 0.00      | 0.0 ± 0.00      | 0.0 ± 0.00   |
| L2    | 10.6 ± 0.15  | 9.4 ± 0.22      | 0.0 ± 0.00      | 0.0 ± 0.00      | 13.4 ± 0.05     | 0.0 ± 0.00   |
| L3    | 27.7 ± 0.10  | 16.5 ± 0.06     | 12.7 ± 0.10     | 21.1 ± 0.03     | 21.1 ± 0.10     | 16.0 ± 0.07  |
| L4    | 47.1 ± 0.14  | 18.9 ± 0.07     | 16.0 ± 0.14     | 14.4 ± 0.05     | 14.2 ± 0.16     | 15.7 ± 0.05  |
| YA    | 13.7 ± 0.16  | 14.1 ± 0.10     | 21.8 ± 0.09     | 15.1 ± 0.02     | 21.3 ± 0.09     | 22.9 ± 0.05  |
| A     | 0.7 ± 0.01   | 41.0 ± 0.17     | 49.5 ± 0.21     | 49.3 ± 0.04     | 30.0 ± 0.04     | 45.4 ± 0.35  |
| 30 mM | mock         | <i>cyp-35A2</i> | <i>cyp-35A3</i> | <i>cyp-35A4</i> | <i>cyp-35A5</i> | quadruple*   |
| L1    | 94.2 ± 0.02  | 52.1 ± 0.23     | 54.0 ± 0.11     | 52.8 ± 0.10     | 52.9 ± 0.06     | 31.2 ± 0.06  |
| L2    | 5.5 ± 0.02   | 41.8 ± 0.07     | 44.8 ± 0.02     | 42.8 ± 0.03     | 44.9 ± 0.02     | 62.8 ± 0.03  |
| L3    | 0.3 ± 0.01   | 5.4 ± 0.04      | 1.2 ± 0.01      | 4.4 ± 0.01      | 2.2 ± 0.01      | 6.0 ± 0.04   |
| L4    | 0.0 ± 0.00   | 0.7 ± 0.01      | 0.0 ± 0.00      | 0.0 ± 0.00      | 0.0 ± 0.00      | 0.0 ± 0.00   |
| YA    | 0.0 ± 0.00   | 0.0 ± 0.00      | 0.0 ± 0.00      | 0.0 ± 0.00      | 0.0 ± 0.00      | 0.0 ± 0.00   |
| A     | 0.0 ± 0.00   | 0.0 ± 0.00      | 0.0 ± 0.00      | 0.0 ± 0.00      | 0.0 ± 0.00      | 0.0 ± 0.00   |
| 96 h  |              |                 |                 |                 |                 |              |
| 0 mM  | mock         | <i>cyp-35A2</i> | <i>cyp-35A3</i> | <i>cyp-35A4</i> | <i>cyp-35A5</i> | quadruple*   |
| L1    | 0.0 ± 0.00   | 0.0 ± 0.00      | 0.0 ± 0.00      | 0.0 ± 0.00      | 0.0 ± 0.00      | 0.0 ± 0.00   |
| L2    | 0.0 ± 0.00   | 0.0 ± 0.00      | 0.0 ± 0.00      | 0.0 ± 0.00      | 0.0 ± 0.00      | 0.0 ± 0.00   |
| L3    | 0.0 ± 0.00   | 0.0 ± 0.00      | 0.0 ± 0.00      | 0.0 ± 0.00      | 0.0 ± 0.00      | 0.0 ± 0.00   |
| L4    | 0.0 ± 0.00   | 0.0 ± 0.00      | 0.0 ± 0.00      | 0.0 ± 0.00      | 0.0 ± 0.00      | 0.0 ± 0.00   |
| YA    | 0.0 ± 0.00   | 0.0 ± 0.00      | 0.0 ± 0.00      | 0.0 ± 0.00      | 0.0 ± 0.00      | 0.0 ± 0.00   |
| A     | 100.0 ± 0.00 | 100.0 ± 0.00    | 100.0 ± 0.00    | 100.0 ± 0.00    | 100.0 ± 0.00    | 100.0 ± 0.00 |
| 10 mM | mock         | <i>cyp-35A2</i> | <i>cyp-35A3</i> | <i>cyp-35A4</i> | <i>cyp-35A5</i> | quadruple*   |
| L1    | 0.0 ± 0.00   | 0.0 ± 0.00      | 0.0 ± 0.00      | 0.0 ± 0.00      | 0.0 ± 0.00      | 0.0 ± 0.00   |
| L2    | 0.0 ± 0.00   | 0.0 ± 0.00      | 0.0 ± 0.00      | 0.0 ± 0.00      | 0.0 ± 0.00      | 0.0 ± 0.00   |
| L3    | 0.0 ± 0.00   | 0.0 ± 0.00      | 0.0 ± 0.00      | 0.0 ± 0.00      | 0.0 ± 0.00      | 0.0 ± 0.00   |
| L4    | 9.6 ± 0.04   | 0.0 ± 0.00      | 0.0 ± 0.00      | 0.0 ± 0.00      | 0.0 ± 0.00      | 0.0 ± 0.00   |
| YA    | 1.9 ± 0.01   | 7.1 ± 0.02      | 3.5 ± 0.01      | 2.6 ± 0.02      | 6.9 ± 0.02      | 2.5 ± 0.03   |
| A     | 88.5 ± 0.04  | 92.9 ± 0.06     | 96.5 ± 0.13     | 97.4 ± 0.15     | 93.1 ± 0.11     | 97.5 ± 0.65  |
| 30 mM | mock         | <i>cyp-35A2</i> | <i>cyp-35A3</i> | <i>cyp-35A4</i> | <i>cyp-35A5</i> | quadruple*   |
| L1    | 94.0 ± 0.02  | 50.8 ± 0.23     | 52.5 ± 0.11     | 50.5 ± 0.10     | 52.5 ± 0.06     | 30.5 ± 0.06  |
| L2    | 5.7 ± 0.02   | 44.0 ± 0.02     | 46.0 ± 0.02     | 45.0 ± 0.02     | 45.0 ± 0.02     | 63.0 ± 0.17  |
| L3    | 0.3 ± 0.01   | 4.5 ± 0.01      | 1.5 ± 0.03      | 4.5 ± 0.01      | 2.5 ± 0.01      | 6.5 ± 0.04   |
| L4    | 0.0 ± 0.00   | 0.7 ± 0.02      | 0.0 ± 0.00      | 0.0 ± 0.00      | 0.0 ± 0.00      | 0.0 ± 0.00   |
| YA    | 0.0 ± 0.00   | 0.0 ± 0.00      | 0.0 ± 0.00      | 0.0 ± 0.00      | 0.0 ± 0.00      | 0.0 ± 0.00   |
| A     | 0.0 ± 0.00   | 0.0 ± 0.00      | 0.0 ± 0.00      | 0.0 ± 0.00      | 0.0 ± 0.00      | 0.0 ± 0.00   |

\*RNAi depletion was treated in quadruple combination of *cyp-35A2*, *cyp-35A3*, *cyp-35A4*, and *cyp-35A5*.

N2 worms synchronized at the L1 larval stage were treated with soaking RNAi (single or quadruple RNAi) to deplete *cyp-35A* family gene activity. Worms were then transferred to 0 mM, 10 mM or 30 mM caffeine-containing NGM plates and cultured at 20°C. 250 worms were examined for each RNAi of *cyp* genes at each concentration of caffeine. After culturing, their larval development was scored in 24 h intervals for 96 h, and average values of percent distribution of worms in each developmental stage after respective RNAi are summarized.
